# Supplementary material
Source: Springer Nature journal article supplement (https://www.springermedizin.de/resource/supplementary/12943_2010_833_MOESM11_ESM.pdf/9554940)

Holo-2H10

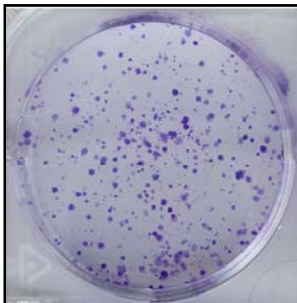

Holo-2G7

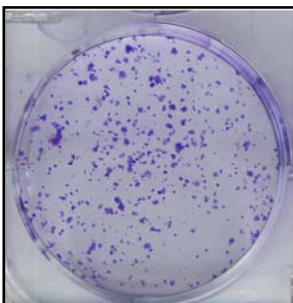

Para-4C1

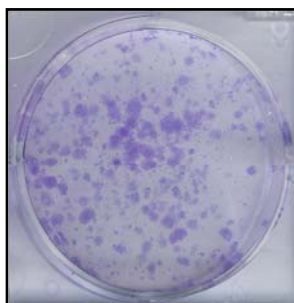

Para-4E10

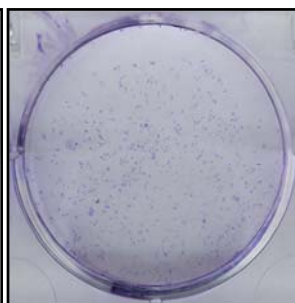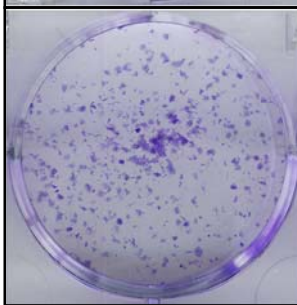

Holo-1A8

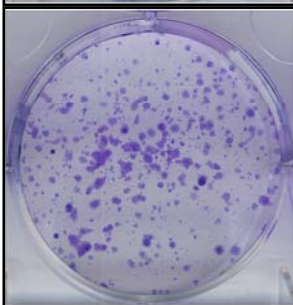

Holo-5A2

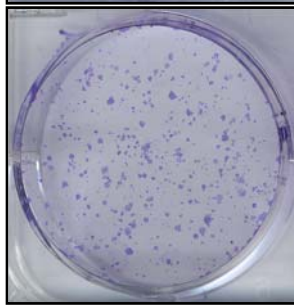

Para-2B6

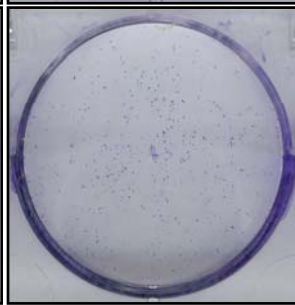

Para-5C6

Parent PC3

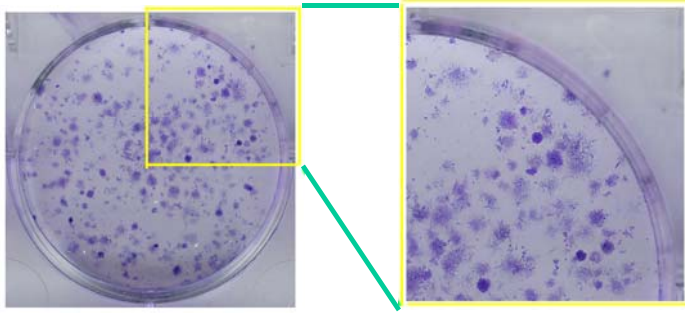

Supplement: MOESM11 [file 9554940]
